# Supplementary material
Source: publisher figshare collection journal article supplement (https://karger.figshare.com/ndownloader/files/38900916)
Supplement: Supplementary file 1 [file 38900916]

S3. GTD knowledge questionnaire (translated from Dutch)

Answer options: True, False or don’t know

1. Gestational Trophoblastic Disease (GTD) is a group of rare diseases
2. The cells that form GTD are called trophoblasts and come from tissue that grows to form the placenta.
3. Trophoblastic tumors can spread (metastasizes) to other parts of the body, for example to the lungs.
4. A molar pregnancy can develop into persistent trophoblastic disease, also called postmolar Gestational Trophoblastic Neoplasia (GTN)
5. Postmolar GTN, choriocarcinoma, PSTT and ETT are benign forms of GTD
6. The hCG pregnancy hormone has an important role in the diagnosis of trophoblastic diseases.
7. GTD can be treated, and most types -- even if they’re cancerous -- can be cured.
8. Molar pregnancies should be treated by evacuating the uterus by uterine suction or by surgical curettage
9. Women under 15 or over 40 years of age have a lower risk of developing a molar pregnancy
10. A partial molar pregnancy is treated differently than a complete molar pregnancy
11. A woman may become pregnant immediately after treatment for persistent trophoblastic disease.
12. Chemotherapy is the first-line treatment for persistent trophoblastic disease
13. Low risk GTN patients are treated differently than high risk GTN patients
14. The overall 5 year survival of persistent trophoblastic disease is 99%
15. GTN patients with liver or brain metastases have a poorer prognosis

Nederlandse vragenlijst

1. Trofoblastziekten zijn zeldzaam.

2. Trofoblastweefsel bestaat uit trofoblastcellen die de moederkoek (placenta) vormen.

3. Trofoblastziekten kunnen uitzaaien naar andere organen, bijvoorbeeld naar de longen.

4. Een mola-zwangerschap kan zich ontwikkelen tot een persisterende trofoblastziekte.

5. Persisterende trofoblastziekten, choriocarcinoom, PSTT en ETT zijn goedaardige trofoblastziekten.

6. Het zwangerschapshormoon hCG speelt een belangrijke rol in de diagnostiek bij trofoblastziekten.

7. Trofoblastziekten zijn over het algemeen goed te behandelen.

8. Een mola-zwangerschap wordt behandeld met een curettage.

9. Vrouwen onder de 15 en boven de 40 jaar oud hebben een verlaagde kans op een mola-zwangerschap.

10. Een partiele mola zwangerschap wordt anders behandeld dan een complete mola zwangerschap.

11. Een vrouw mag direct zwanger worden na de behandeling van een persisterende trofoblastziekte.

12. Chemotherapie is de eerste keus behandeling voor persisterende trofoblastziekten.

13. Er wordt onderscheid gemaakt in laag en hoog risico trofoblastziekten die verschillend worden behandeld.

14. De vijfjaarsoverleving na een persisterende trofoblastziekte is 99%.

15. Patiënten met een trofoblastziekte die uitzaaiingen in de lever of hersenen hebben, hebben een slechtere prognose.
